# Supplementary material for: Triethanolamine-assisted photodeposition of non-crystalline CuxP nanodots for boosting photocatalytic H2 evolution of TiO2
Source: Royal Society of Chemistry journal article supplement (doi:10.1039/d0tc03641b), 2020-01-01
Supplement: d0tc03641b1.pdf [file d0tc03641b1.pdf]

## Supporting Information

### **Triethanolamine-assisted photodeposition of non-crystalline $\text{Cu}_x\text{P}$ nanodots for boosting photocatalytic $\text{H}_2$ evolution of $\text{TiO}_2$**

Jiachao Xu<sup>a</sup>, Wei Zhong<sup>a</sup>, Huogen Yu<sup>a\*</sup>, Xuekun Hong<sup>b\*</sup>, Jiajie Fan<sup>c</sup>, and Jiaguo Yu<sup>d</sup>

<sup>a</sup> Department of Chemistry, School of Chemistry, Chemical Engineering and Life Sciences, Wuhan University of Technology, 122 Luoshi Road, Wuhan 430070, PR China

<sup>b</sup> School of electronic and information engineering, Changshu Institute of Technology, Changshu 215500, PR China

<sup>c</sup> School of Materials Science and Engineering, Zhengzhou university, 100 Science Avenue, Zhengzhou 450002, PR China

<sup>d</sup> State Key Laboratory of Advanced Technology for Material Synthesis and Processing, Wuhan university of Technology, 122 Luoshi Road, Wuhan 430070, PR China

Tel: 0086-27-87756662, Fax: 0086-27-87879468

E-mail: yuhuogen@whut.edu.cn (H. Yu); xkhong@csit.edu.cn (X. Hong)

## EXPERIMENTAL SECTION

### SI-1 Photoelectrochemical measurements

Photoelectrochemical measurements are conducted on electrochemical analyzer (CHI660E, China) with  $\text{Na}_2\text{SO}_4$  solution (0.5 M) as the electrolyte. The reaction system includes working electrode, Pt counter electrode, and AgCl reference electrode. The light source was provided by one UV light (365 nm, 3 W). The sample-loaded FTO glasses were used as working electrodes. Typically, the sample (10 mg) is uniformly mixed with a solution of absolute ethanol and Nafion D-520 (1:1) by ultrasonic. The obtained suspension was spread on the FTO glass and stored in 60 °C oven for 12 h. The LSV measurement was carried out by a bias range of -0.8 to -1.6 V. In addition, the frequency range was set in a range of  $10^{-3}$ - $10^{-6}$  Hz to measure the EIS. Transient photocurrent responses with time (*i-t* curves) were determined at +0.5 V bias potential during repeated ON/OFF illumination cycles under 3W-LED (365 nm, 80 mW cm<sup>-2</sup>) as light source. Mott–Schottky plots are measured under a frequency of 1000 Hz in 0.5 M  $\text{Na}_2\text{SO}_4$  aqueous solution.

## SI-2 The AQE calculation

The apparent quantum efficiency (AQE) of  $\text{Cu}_x\text{P}/\text{TiO}_2(1\text{wt}\%)$  photocatalyst is calculated via the following equation:

$$\begin{aligned}\text{AQE}(\%) &= \frac{\text{number of reacted electrons}}{\text{number of incident photons}} \times 100\% \\ &= \frac{\text{number of evolved H}_2 \text{ molecules} \times 2}{\text{number of incident photons}} \times 100\%\end{aligned}$$

The average power of the UV-light (four 3-W 365 nm) was  $17 \text{ mW}/\text{cm}^2$ . Hence, the AQE can be calculated to be 7.7 %.

**Table S1** Preparation conditions of contrast experiments

| Sample | TiO <sub>2</sub> | CuSO <sub>4</sub><br>(0.1 M) <sup>a</sup> | NaH <sub>2</sub> PO <sub>2</sub><br>(0.2 mol/L <sup>-1</sup> ) | Irradiation<br>time | H <sub>2</sub> -evolution<br>rate |
|--------|------------------|-------------------------------------------|----------------------------------------------------------------|---------------------|-----------------------------------|
| A      | ----             | 0.317 ml                                  | 20 ml                                                          | 60 min              | 0 μmol h <sup>-1</sup>            |
| B      | 200 mg           | ----                                      | 20 ml                                                          | 60 min              | 2.8 μmol h <sup>-1</sup>          |
| C      | 200 mg           | 0.317 ml                                  | ----                                                           | 60 min              | 3.1 μmol h <sup>-1</sup>          |
| D      | 200 mg           | 0.317 ml                                  | 20 ml                                                          | ----                | 0 μmol h <sup>-1</sup>            |
| E      | 200 mg           | 0.317 ml                                  | 20 ml                                                          | 60 min              | 93.5 μmol h <sup>-1</sup>         |

<sup>a</sup> the CuSO<sub>4</sub> aqueous solution with the presence of TEOA, where the molar ratio of TEOA to CuSO<sub>4</sub> was about 7:1.

**Table S2** Fluorescence Emission Lifetime and Relevant Percentage Data Fitted by a Three-Exponential Function

| Samples                                          | $\tau_1$<br>(ns) | $A_1$<br>(%) | $\tau_2$<br>(ns) | $A_2$<br>(%) | Average lifetime<br>( $\tau_a$ ) (ns) |
|--------------------------------------------------|------------------|--------------|------------------|--------------|---------------------------------------|
| TiO <sub>2</sub>                                 | 0.18             | 76.03        | 2.63             | 23.97        | 2.19                                  |
| Cu <sub>x</sub> P-<br>ND/TiO <sub>2</sub> (1wt%) | 0.2              | 78.62        | 2.79             | 21.38        | 2.25                                  |

The above fitted parameters are acquired via the following tri-exponential formulas:

$$I_{(t)} = I_0 + A_1 \exp(-t/\tau_1) + A_2 \exp(-t/\tau_2) + A_3 \exp(-t/\tau_3)$$

$$(1) \tau_{av} = (A_1 \tau_1^2 + A_2 \tau_2^2 + A_3 \tau_3^2) / (A_1 \tau_1 + A_2 \tau_2 + A_3 \tau_3)$$

(2) where  $I_0$  is the baseline correction value,  $A_1$ ,  $A_2$  and  $A_3$  represent the tri-exponential factors, and  $\tau_1$ ,  $\tau_2$ ,  $\tau_3$  and  $\tau_a$  corresponding the lifetime in various stages (radiation, non-radiation and energy transfer) and average lifetime.

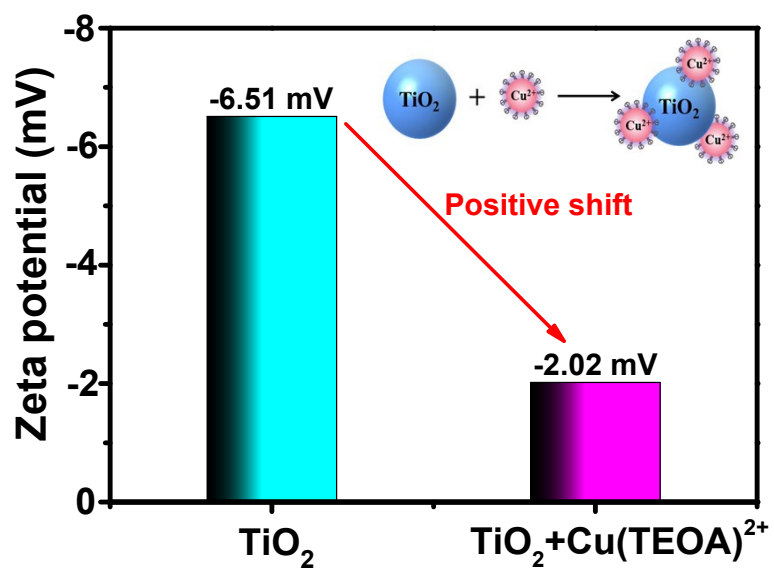

Fig. S1 Zeta potentials of TiO<sub>2</sub> before and after Cu(TEOA)<sup>2+</sup> modification.

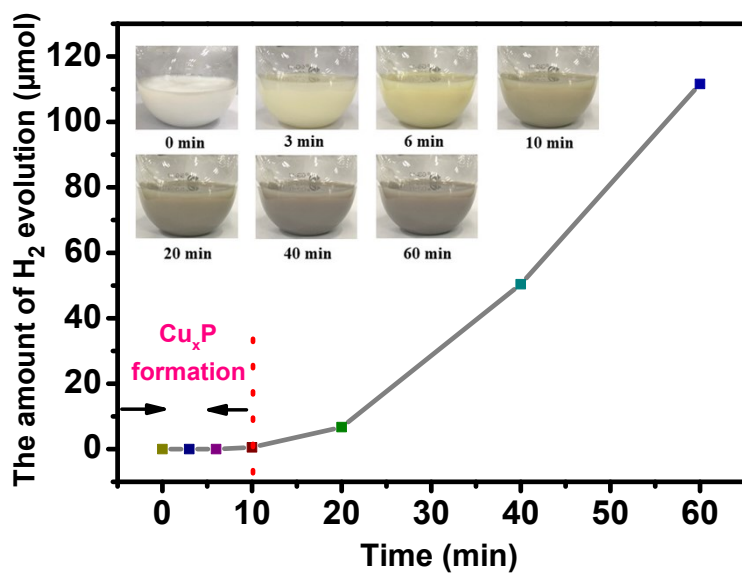

**Fig. S2** Hydrogen production performance and color change during the photodeposition of Cu<sub>x</sub>P/TiO<sub>2</sub>(1wt%).

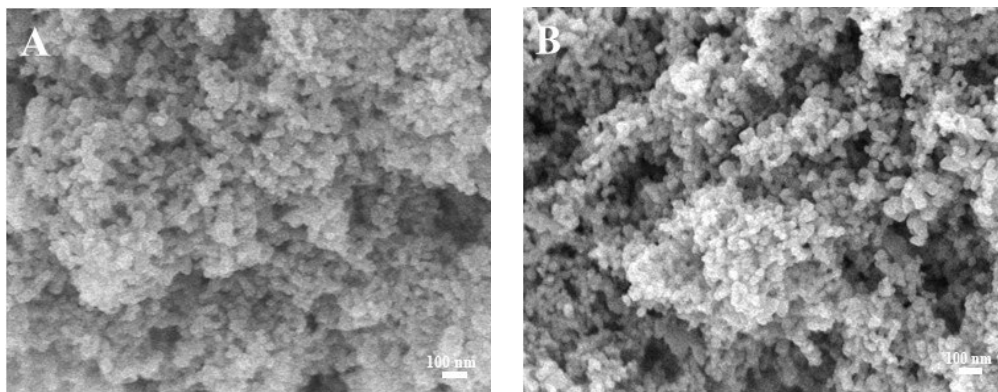

**Fig. S3** FESEM images of (A) TiO<sub>2</sub> and (B) Cu<sub>x</sub>P-ND/TiO<sub>2</sub>(1wt%).



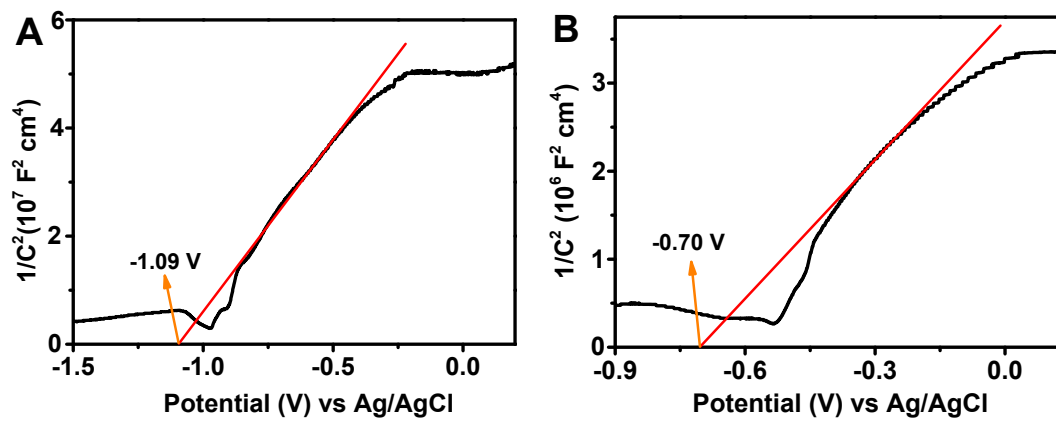

**Fig. S4** Mott-Schottky plots of (A)  $\text{TiO}_2$  and (B)  $\text{Cu}_x\text{P-ND/TiO}_2(1\text{wt}\%)$  in 0.5M  $\text{Na}_2\text{SO}_4$  solution (pH = 7)

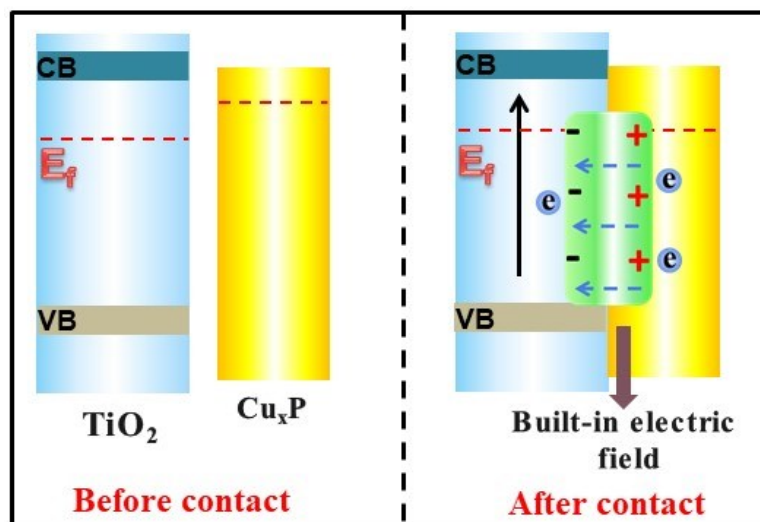

**Fig. S5** Schematic illustration of electron transfer path before and after contact of TiO<sub>2</sub> and Cu<sub>x</sub>P nanodots.
